# Supplementary material
Source: PubMed Central journal article supplement (PMC6173642)

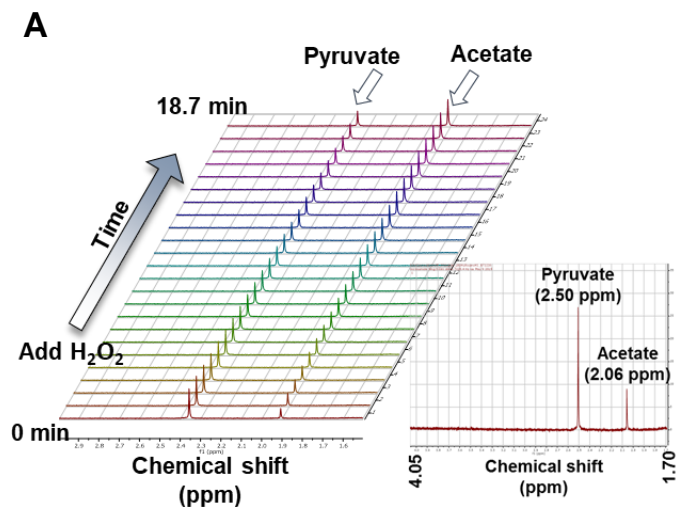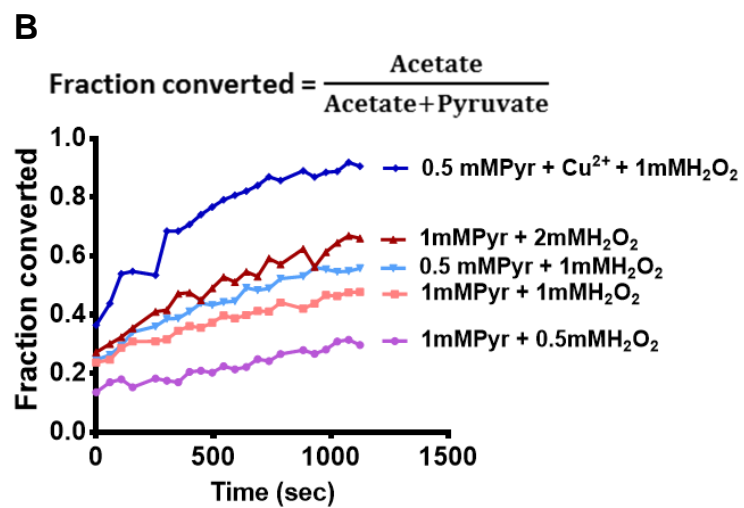

**C**

| Pyruvate (mM) | H <sub>2</sub> O <sub>2</sub> (mM) | CuSO <sub>4</sub> (mM) | Fraction converted |
|---------------|------------------------------------|------------------------|--------------------|
| 1             | 0.5                                | 0                      | 0.30               |
| 1             | 1                                  | 0                      | 0.48               |
| 1             | 2                                  | 0                      | 0.66               |
| 0.5           | 1                                  | 0                      | 0.56               |
| 0.5           | 1                                  | 0.2                    | 0.91               |

Reaction constant =  $0.19 \pm 0.05$  (mM<sup>-1</sup>min<sup>-1</sup>)

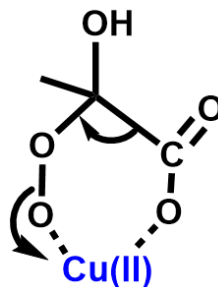

Supplement: NIHMS1504864-supplement-3.pdf [file NIHMS1504864-supplement-3.pdf]
