# Supplementary material
Source: PubMed Central journal article supplement (PMC6173642)
Supplement: NIHMS1504864-supplement-4.pdf [file NIHMS1504864-supplement-4.pdf]

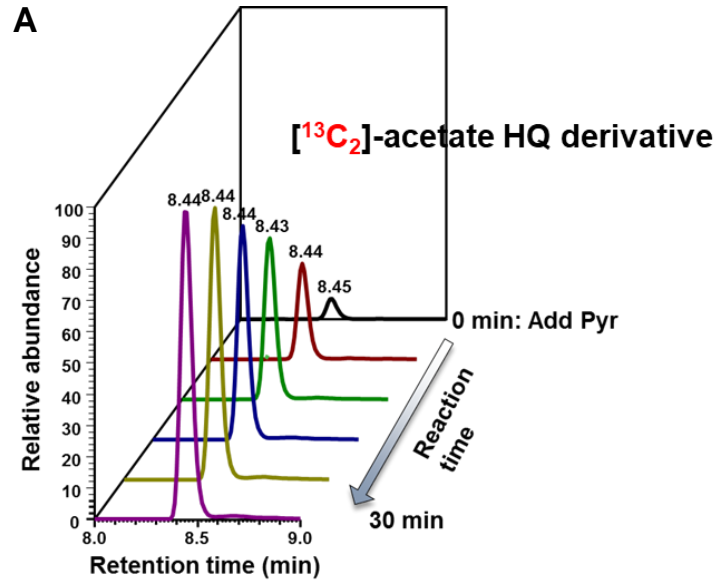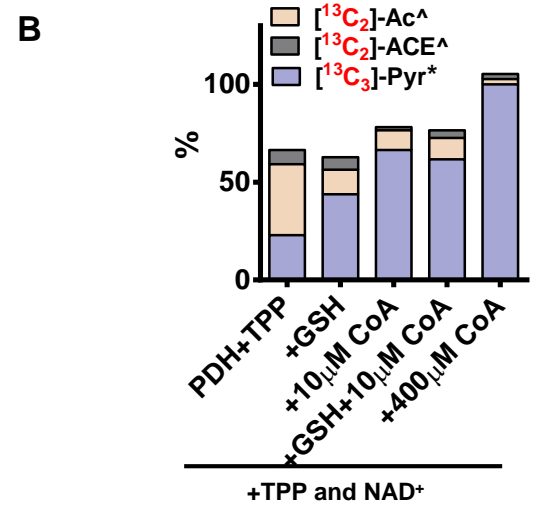

<sup>^</sup> Fraction of total pyruvate consumed  
<sup>\*</sup> Relative pyruvate consumption (normalized to that with 400  $\mu\text{M}$  CoA)
