# Supplementary material
Source: PubMed Central journal article supplement (PMC6173642)

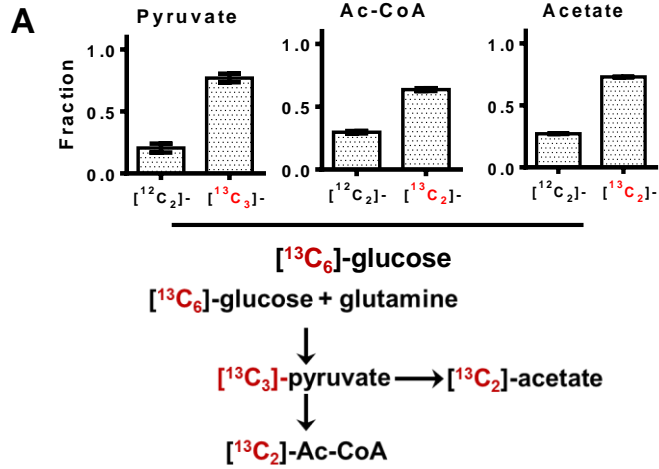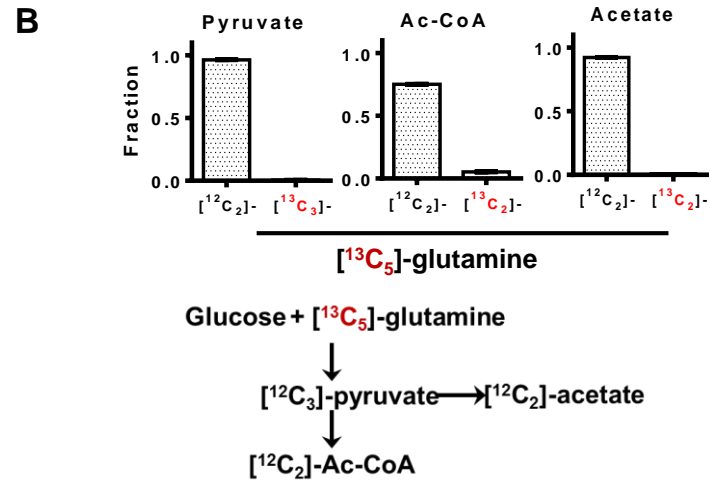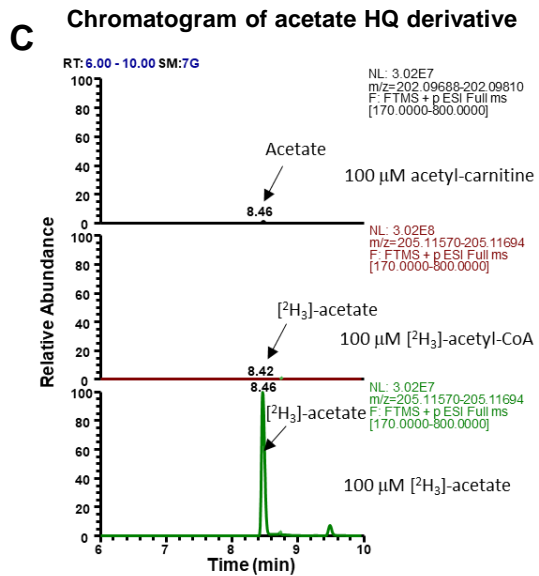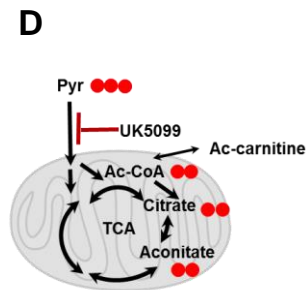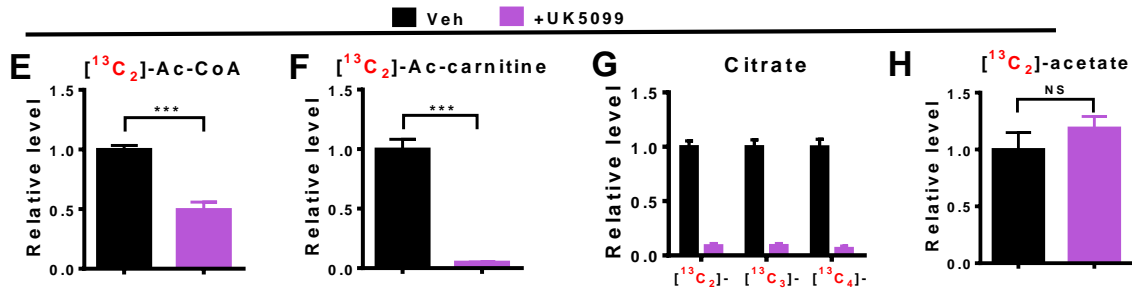

Supplement: NIHMS1504864-supplement-2.pdf [file NIHMS1504864-supplement-2.pdf]
